# Supplementary material for: The role of Sec3p in secretory vesicle targeting and exocyst complex assembly
Source: PubMed Central journal article supplement — Mol Biol Cell. 2014 Nov 15;25(23):3813–22. doi: 10.1091/mbc.E14-04-0907 (PMC4230786; doi:10.1091/mbc.e14-04-0907), 2014-11-15

# Supplemental Materials

*Molecular Biology of the Cell*

Luo et al.

## **SUPPLEMENTAL MATERIALS:**

**Supplemental Figure 1.** Ectopic targeting of Tom20-mCherry-tagged exocyst subunits to mitochondria. Colocalization of Tom20-mCherry-tagged exocyst subunits with Cit1-GFP, a marker for mitochondria.

**Supplemental Figure 2.** Sec3-GFP was recruited to mitochondria in cells expressing Tom20-mCherry tagged exocyst subunits Sec5p, Sec6p, Sec8p, Sec10p, Sec15p, Exo84p, but not Exo70p.

**Supplemental Figure 3.** Sec4p, Bgl2p and Chs3p associated with mitochondria in cells expressing Tom20-mCherry-Sec3p, but not those expressing Tom20-mCherry. (A) Total lysates from cells expressing Tom20-mCherry or Tom20-mCherry-Sec3p were separated by SDS-PAGE. The amounts of Tom20-mCherry, Tom20-mCherry-Sec3p, Sec4p, Bgl2p, Chs3p, and alcohol dehydrogenase (“Adh1p”, as a loading control) were analyzed by immunoblotting. Molecular weights (in “kD”) are indicated to the left. (B) Mitochondria were purified as previously described (Meisinger et al., 2006). The association of Sec4p, Bgl2p and Chs3p to mitochondria in cells expressing Tom20-mCherry or Tom20-mCherry-Sec3p was analyzed by immunoblotting.

**Supplemental Figure 4.** Sec4p was not recruited to mitochondria by Tom20-mCherry tagged exocyst subunits Sec5p, Sec6p, Sec8p, Sec10p, Sec15p, Exo70p, and Exo84p. With either DMSO or latrunculin B treatment, Sec4p was not recruited to mitochondria in these cells.

**Supplemental Figure 5. Latrunculin-treatment does not affect the recruitment of Sec8p to mitochondria in cells expressing Tom20-mCherry-Sec3p.** Localization of Sec8-GFP was examined in cells expressing Tom20-mCherry or Tom20-mCherry-Sec3p treated with DMSO (left) or latrunculin B (right).

**Table S1. Yeast strains used in this study**

| <b>Name</b> | <b>Genotype</b>                                        | <b>Source</b>    |
|-------------|--------------------------------------------------------|------------------|
| NY1490      | <i>Mata ura3-52 leu2-3, 112, his3Δ200 trp1 Gal-LA-</i> | Peter Novick lab |
| NY180       | <i>Mata ura3-52 leu2-3, 112</i>                        | Peter Novick lab |
| NY768       | <i>Mata ura3-52 leu2-3, 112 sec1-1</i>                 | Peter Novick lab |
| NY770       | <i>Mata ura3-52 leu2-3, 112 sec2-41</i>                | Peter Novick lab |
| NY774       | <i>Mata ura3-52 leu2-3, 112 sec4-8</i>                 | Peter Novick lab |
| NY877       | <i>Mata ura3-52 leu2-3, 112 sec7-1</i>                 | Peter Novick lab |
| NY782       | <i>Mata ura3-52 leu2-3, 112 sec9-4</i>                 | Peter Novick lab |

**Table S2. Plasmids used in this study**

| <b>Name</b>    | <b>Description</b>                                                      | <b>Source /Comments</b>        |
|----------------|-------------------------------------------------------------------------|--------------------------------|
| <i>pRCLG</i>   | <i>pRS416-CIT1-GFP</i>                                                  | Liza Pon Lab                   |
| <i>p415TEF</i> | <i>CEN LEU2</i>                                                         | Mumberget <i>et al.</i> , 1995 |
| <i>pGV369</i>  | <i>p415TEF-mCherry</i>                                                  | This study                     |
| <i>pGV373</i>  | <i>p415TEF-TOM20-mCherry</i>                                            | This study                     |
| <i>pG1872</i>  | <i>p415TEF-TOM20-mCherry-SEC3</i>                                       | This study                     |
| <i>pG1891</i>  | <i>p415TEF-TOM20-mCherry-SEC3N (a.a.1-320)</i>                          | This study                     |
| <i>pG1892</i>  | <i>p415TEF-TOM20-mCherry-SEC3C (a.a. 321-1336)</i>                      | This study                     |
| <i>pG1889</i>  | <i>p415TEF-TOM20-mCherry-SEC5</i>                                       | This study                     |
| <i>pG1884</i>  | <i>p415TEF-TOM20-mCherry-SEC6</i>                                       | This study                     |
| <i>pG1886</i>  | <i>p415TEF-TOM20-mCherry-SEC8</i>                                       | This study                     |
| <i>pG1887</i>  | <i>p415TEF-TOM20-mCherry-SEC10,</i>                                     | This study                     |
| <i>pG1890</i>  | <i>p415TEF-TOM20-mCherry-SEC15</i>                                      | This study                     |
| <i>pG1876</i>  | <i>p415TEF-TOM20-mCherry-EXO70</i>                                      | This study                     |
| <i>pG1880</i>  | <i>p415TEF-TOM20-mCherry-EXO84</i>                                      | This study                     |
| <i>pNB882</i>  | <i>pRS306-SEC6-GFP</i> , digest with BsaBI for chromosomal integration  | Peter Novick Lab               |
| <i>pNB885</i>  | <i>pRS306-SEC8-GFP</i> , digest with BglIII for chromosomal integration | Peter Novick Lab               |
| <i>pGV379</i>  | <i>p415TEF-TOM20-2FLAG</i>                                              | This study                     |
| <i>pG1898</i>  | <i>p415TEF-TOM20-2FLAG-SEC3</i>                                         | This study                     |
| <i>pGV377</i>  | <i>p415TEF-Pex3N-mCherry</i>                                            | This study                     |
| <i>pG1895</i>  | <i>p415TEF-Pex3N-mCherry-SEC3</i>                                       | This study                     |
| <i>pG1896</i>  | <i>p415TEF-Pex3N-mCherry-EXO70</i>                                      | This study                     |
| <i>pG379</i>   | <i>pRS313-CHS3-GFP</i>                                                  | Randy Schekman lab             |

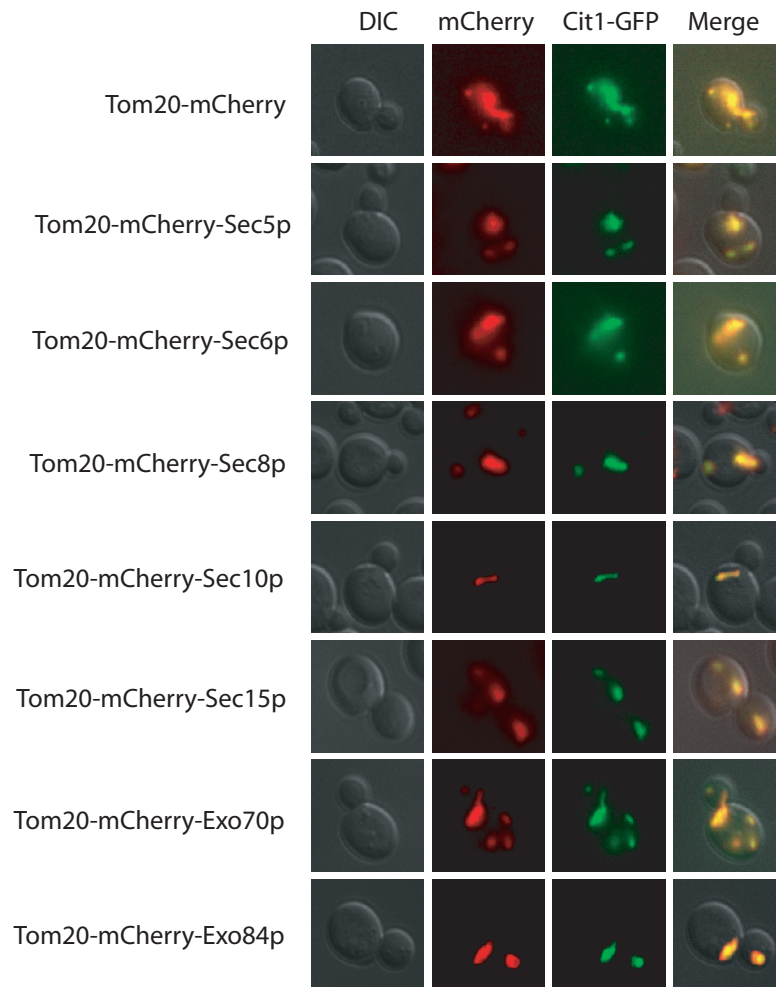

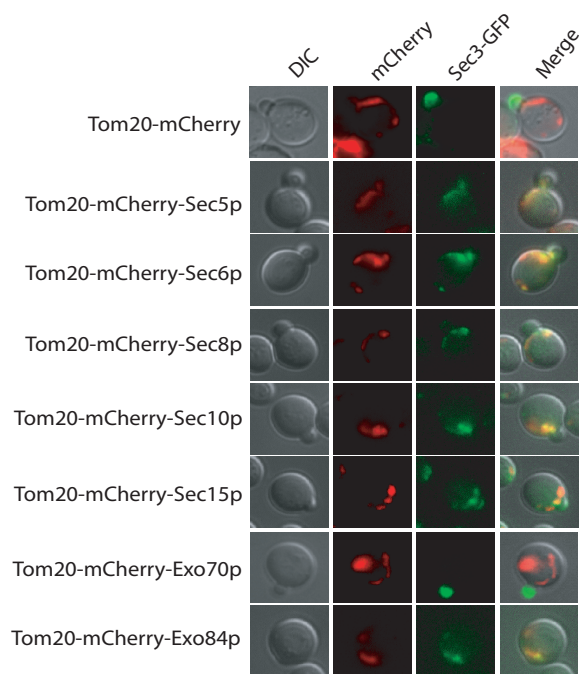

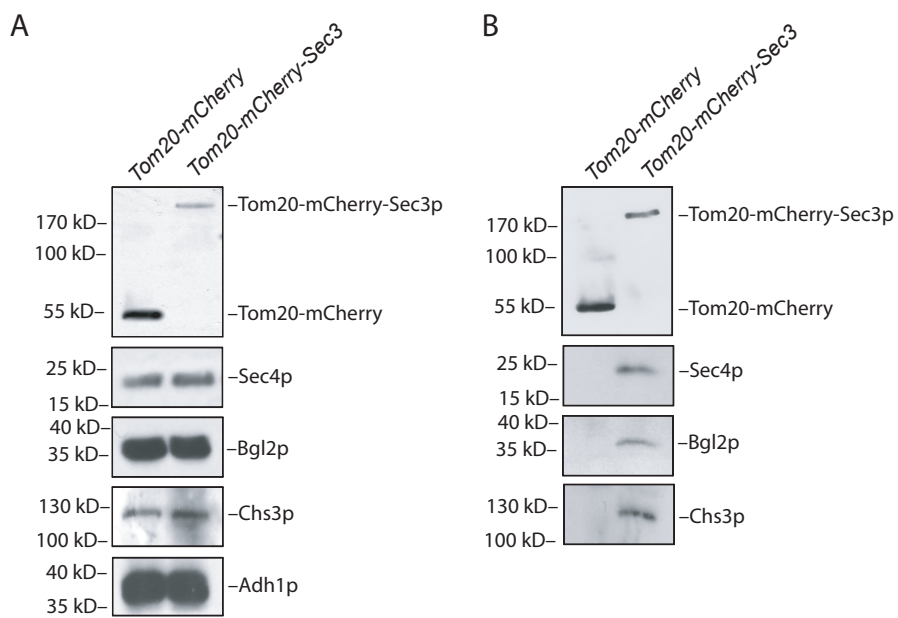

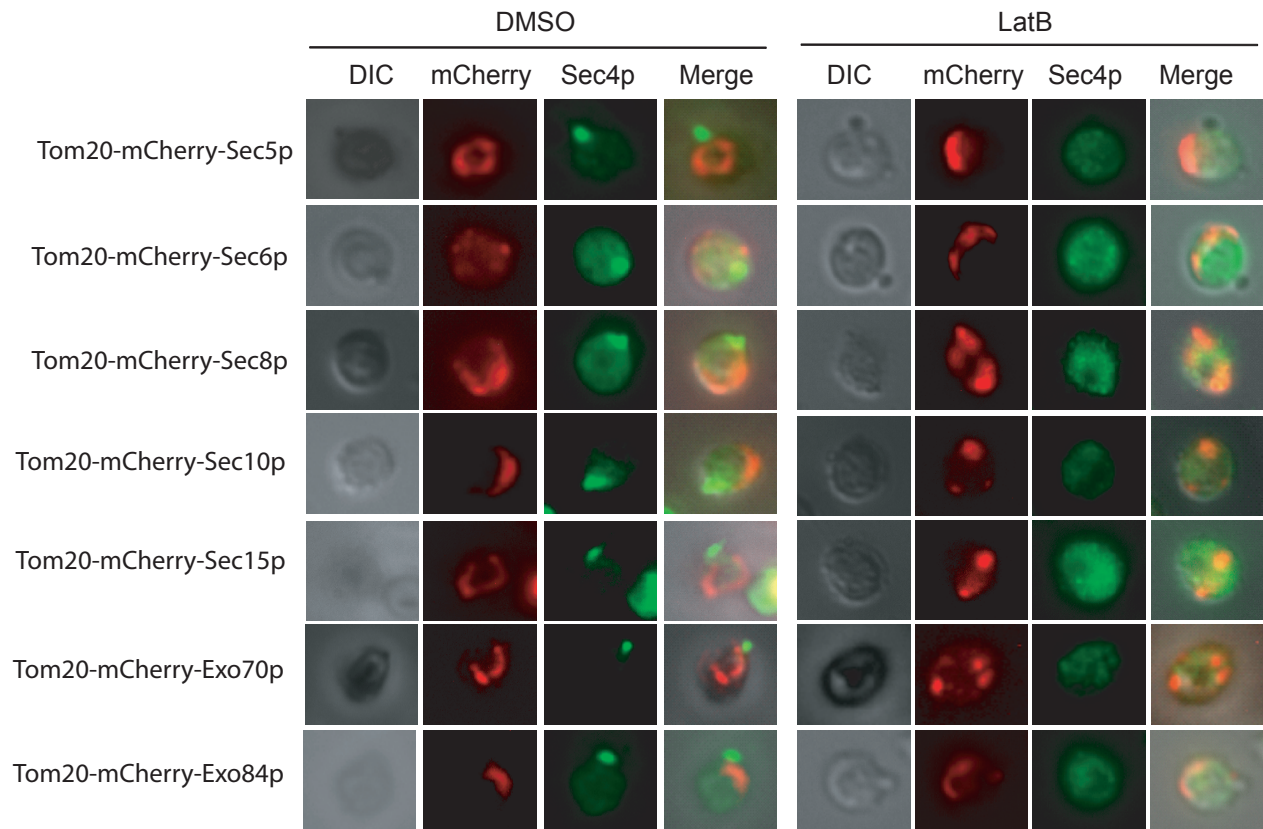



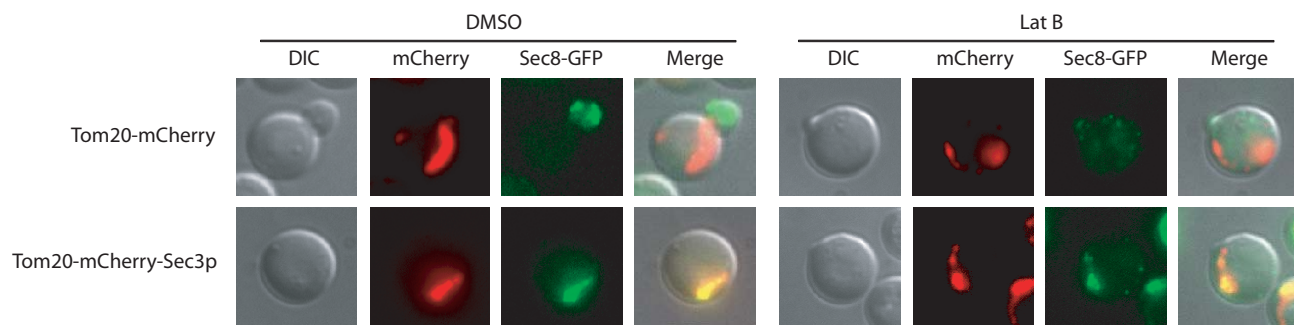

Supplement: supp_E14-04-0907v1_CombinedSupMats.pdf [file supp_E14-04-0907v1_CombinedSupMats.pdf]
